# Supplementary material
Source: PubMed Central journal article supplement (PMC6444630)

**Leukotriene A4 Hydrolase Activation and Leukotriene B4 Production by Eosinophils in Severe**

**Asthma**

Kavita Pal, MD

Xin Feng, MD

John W Steinke, PhD

Marie D Burdick, PhD

Yun M Shim, MD

Sun-Sang Sung, PhD

W. Gerald Teague, MD

Larry Borish, MD

ONLINE DATA SUPPLEMENT

**Figure E1 Cytospin and staining of eosinophils.** Eosinophils were isolated from peripheral blood and purified by magnetic bead column purification. Isolated cells were spun onto slides and stained with various dyes to identify eosinophils. A) Diff-Quik; B) Wright-Giemsa; C) Fast Green.

Figure E1

A

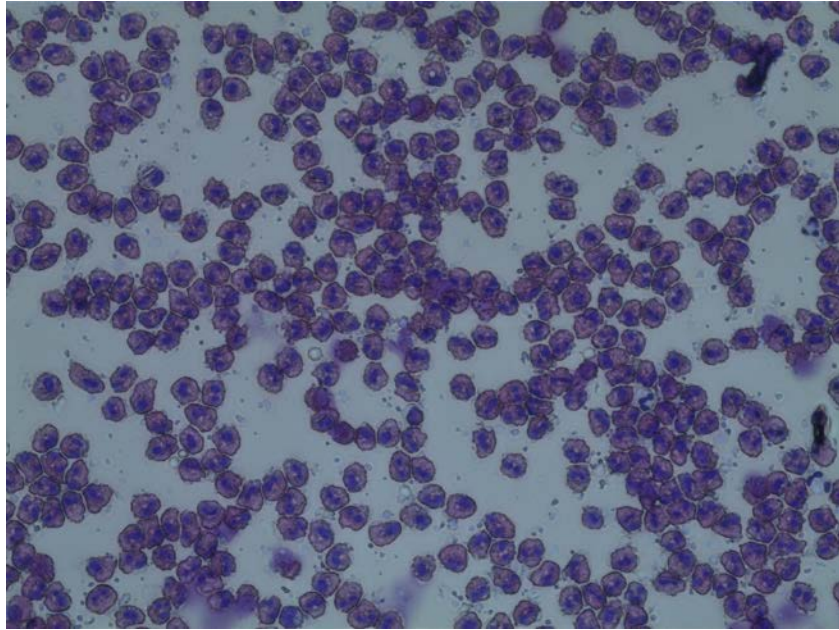

B

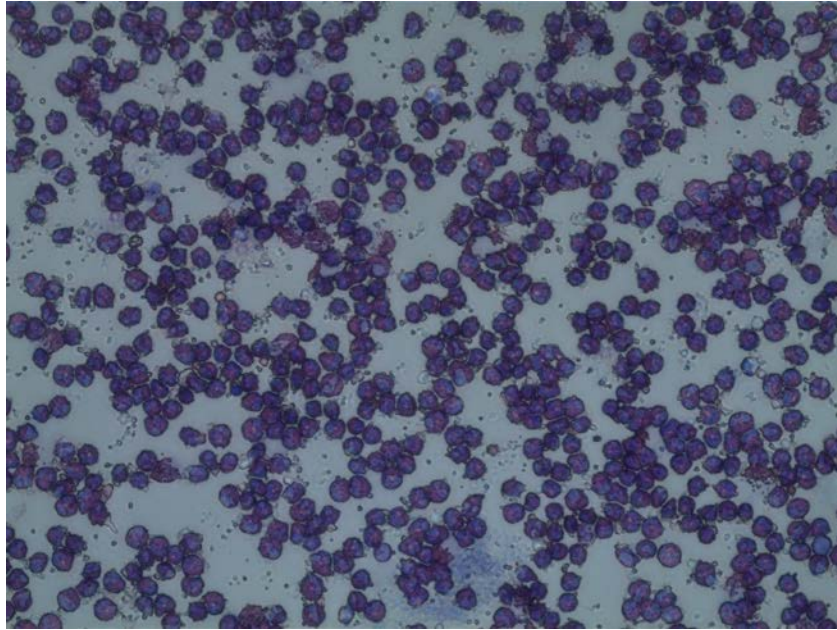

C

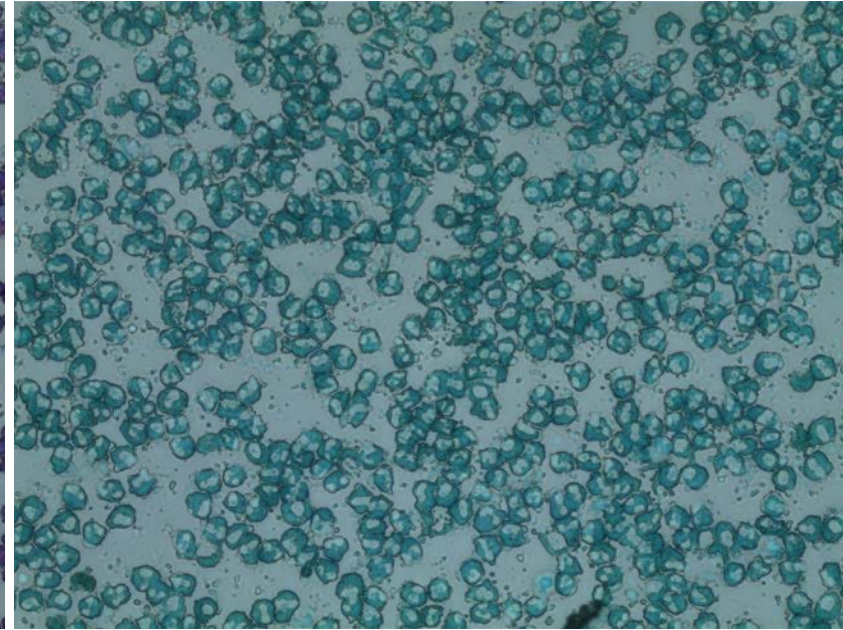

Supplement: rcmb.2018-0175OC_pal_data_supplement.pdf [file rcmb.2018-0175OC_pal_data_supplement.pdf]
